# Supplementary material for: Lung Inflammation Induced by Inactivated SARS-CoV-2 in C57BL/6 Female Mice Is Controlled by Intranasal Instillation of Vitamin D
Source: MDPI journal article supplement (doi:10.3390/cells12071092), 2023-04-06
Supplement: s1 [file s1]

**Supplementary Table S1:** Clones of antibodies used in flow cytometry for immunophenotyping of lung cells.

| Antibody | Manufacturer   | Clone       | Antibody                | Manufacturer   | Clone      |
|----------|----------------|-------------|-------------------------|----------------|------------|
| CD45     | Biologend      | 103151      | F4/80                   | eBiosciences   | BM8        |
| LD       | Invitrogen     | N/A         | IFN- $\gamma$           | Biologend      | XMG1.2     |
| CD103    | eBiosciences   | 46-1031-82  | IL-17                   | eBiosciences   | Ebio 17B7  |
| CD19     | BD Biosciences | HIB19       | TNF- $\alpha$           | eBiosciences   | MP6-XT22   |
| CD11b    | Biologend      | 101257      | IL-6                    | Biologend      | MP5-20F3   |
| Ly6G     | Biologend      | 127626      | Thy 1.2                 | BD Biosciences | 105331     |
| CD11c    | Biologend      | 117336      | TCR- $\beta$            | BD Biosciences | 47-5961-82 |
| MHC II   | Biologend      | M5/114.15.2 | FC Block (anti CD16/32) | Bioxcell       | 2.4G2      |
| Ly6C     | Biologend      | HK1.4       | SinglecF                | BD Biosciences | 562757     |
| CD64     | Biologend      | X54-5/7-1   |                         |                |            |
