# Supplementary material for: Lung Inflammation Induced by Inactivated SARS-CoV-2 in C57BL/6 Female Mice Is Controlled by Intranasal Instillation of Vitamin D
Source: MDPI journal article supplement (doi:10.3390/cells12071092), 2023-04-06
Supplement: s1 [file s1]

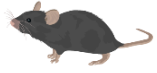

Mice  
C57BL/6

Age of animals:  
15 weeks

### Groups

- Control (Saline)
- Culture medium (Supernatant VERO cells)
- SARS-CoV-2 (Inactivated Virus)

### Procedure

- Nasal instillation (days 1,3 and 5)
- Volume 50ul
- Viral concentration  $4 \cdot 10^5$  PFU

### Collected Samples/ Assays

- BALF
- Total and differential count
- Lung lobes
- Flow Cytometry, qRT-PCR, Histology and Homogenate

Euthanasia 7th day  
after the start  
of the protocol

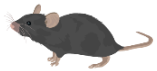

Mice  
C57BL/6

Age of animals:  
15 weeks

### Groups

- Control (Saline)
- SARS-CoV-2 (Inactivated Virus)
- SARS-CoV-2 / Intranasal Vitamin D (Inactivated Virus + Vitamin D IN)
- SARS-CoV-2 / Intraperitoneal Vitamin D (Inactivated Virus + Vitamin D IP)

### Procedure

- Nasal instillation with the virus, except in control (days 1,3 and 5) - 50ul
- Intranasal Vitamin D treatment (days 1,3 and 5) -  $1\mu\text{g}$  per animal
- Intraperitoneal Vitamin D treatment (days 0, 2, 4 and 6) -  $1\mu\text{g}$  per animal

### Collected Samples/ Assays

- BALF (Total and Differential Count)
- Lung ( Cytometry, qRT-PCR and Histology)

Euthanasia 7th day  
after the start  
of the protocol
