# Supplementary figures and images for: Lung Inflammation Induced by Inactivated SARS-CoV-2 in C57BL/6 Female Mice Is Controlled by Intranasal Instillation of Vitamin D
Source: MDPI journal article supplement (doi:10.3390/cells12071092), 2023-04-06

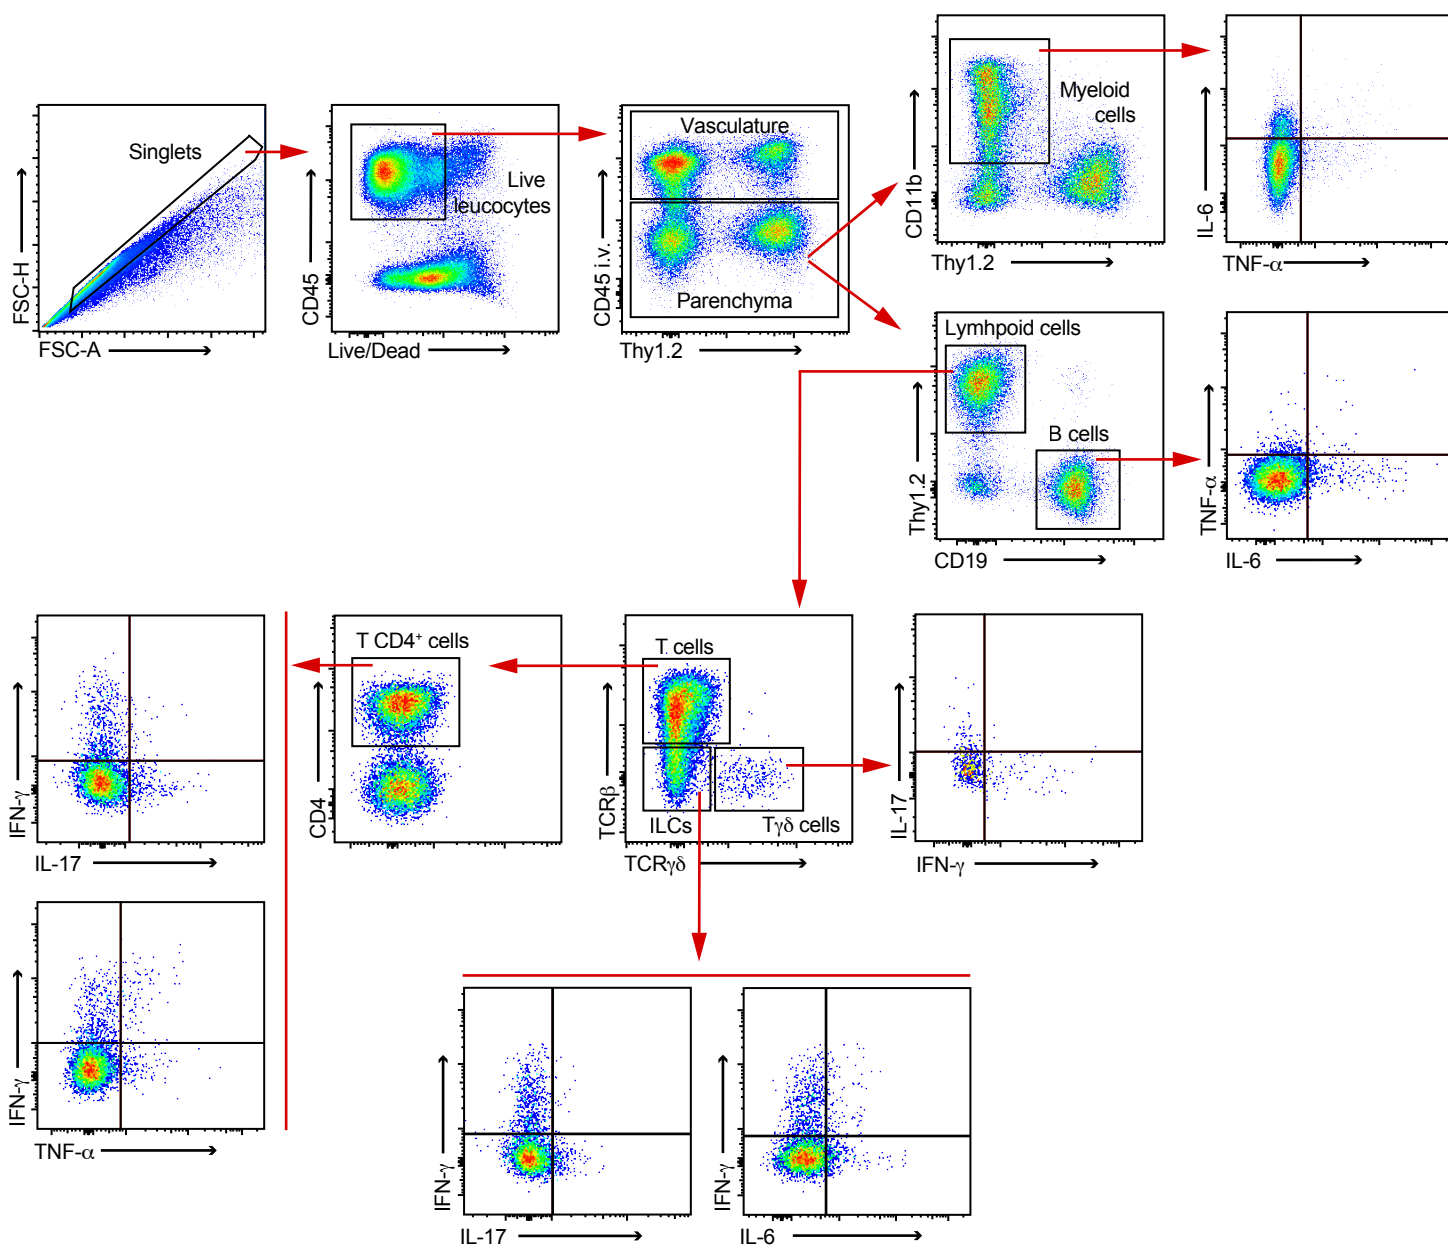

Supplementary Figure 4

Supplement: s1 [file s1]

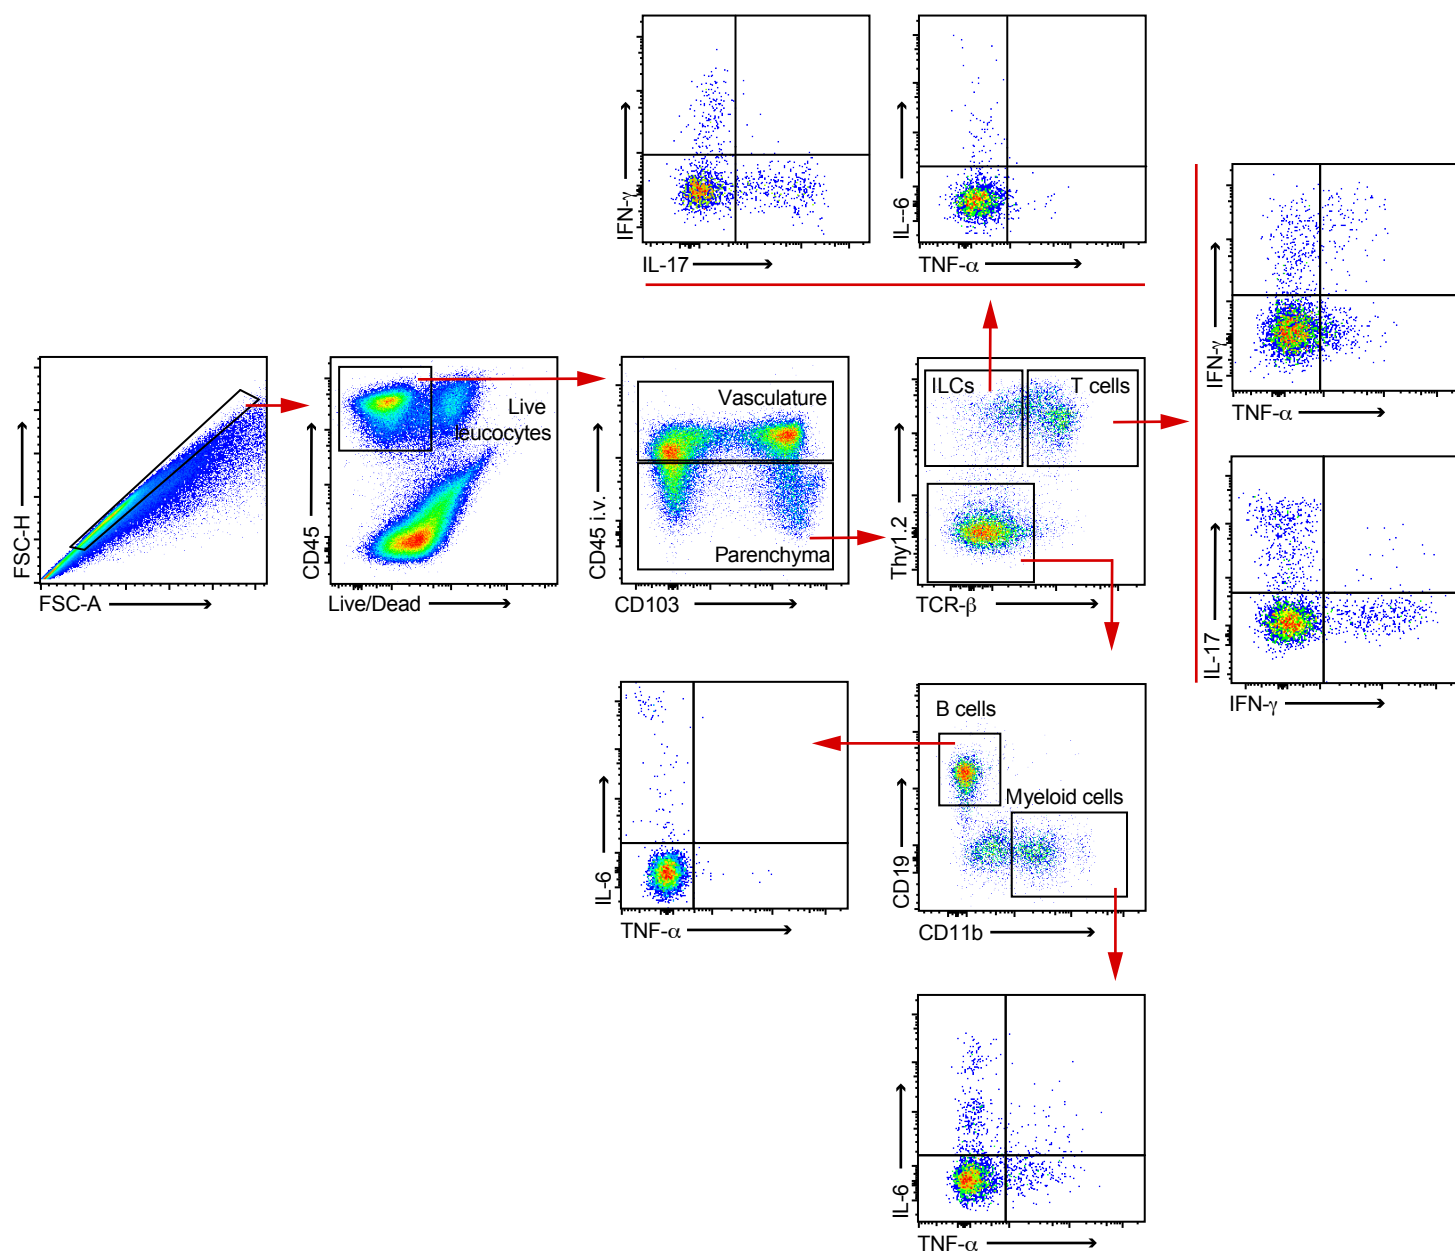

Supplementary Figure 3

Supplement: s1 [file s1]

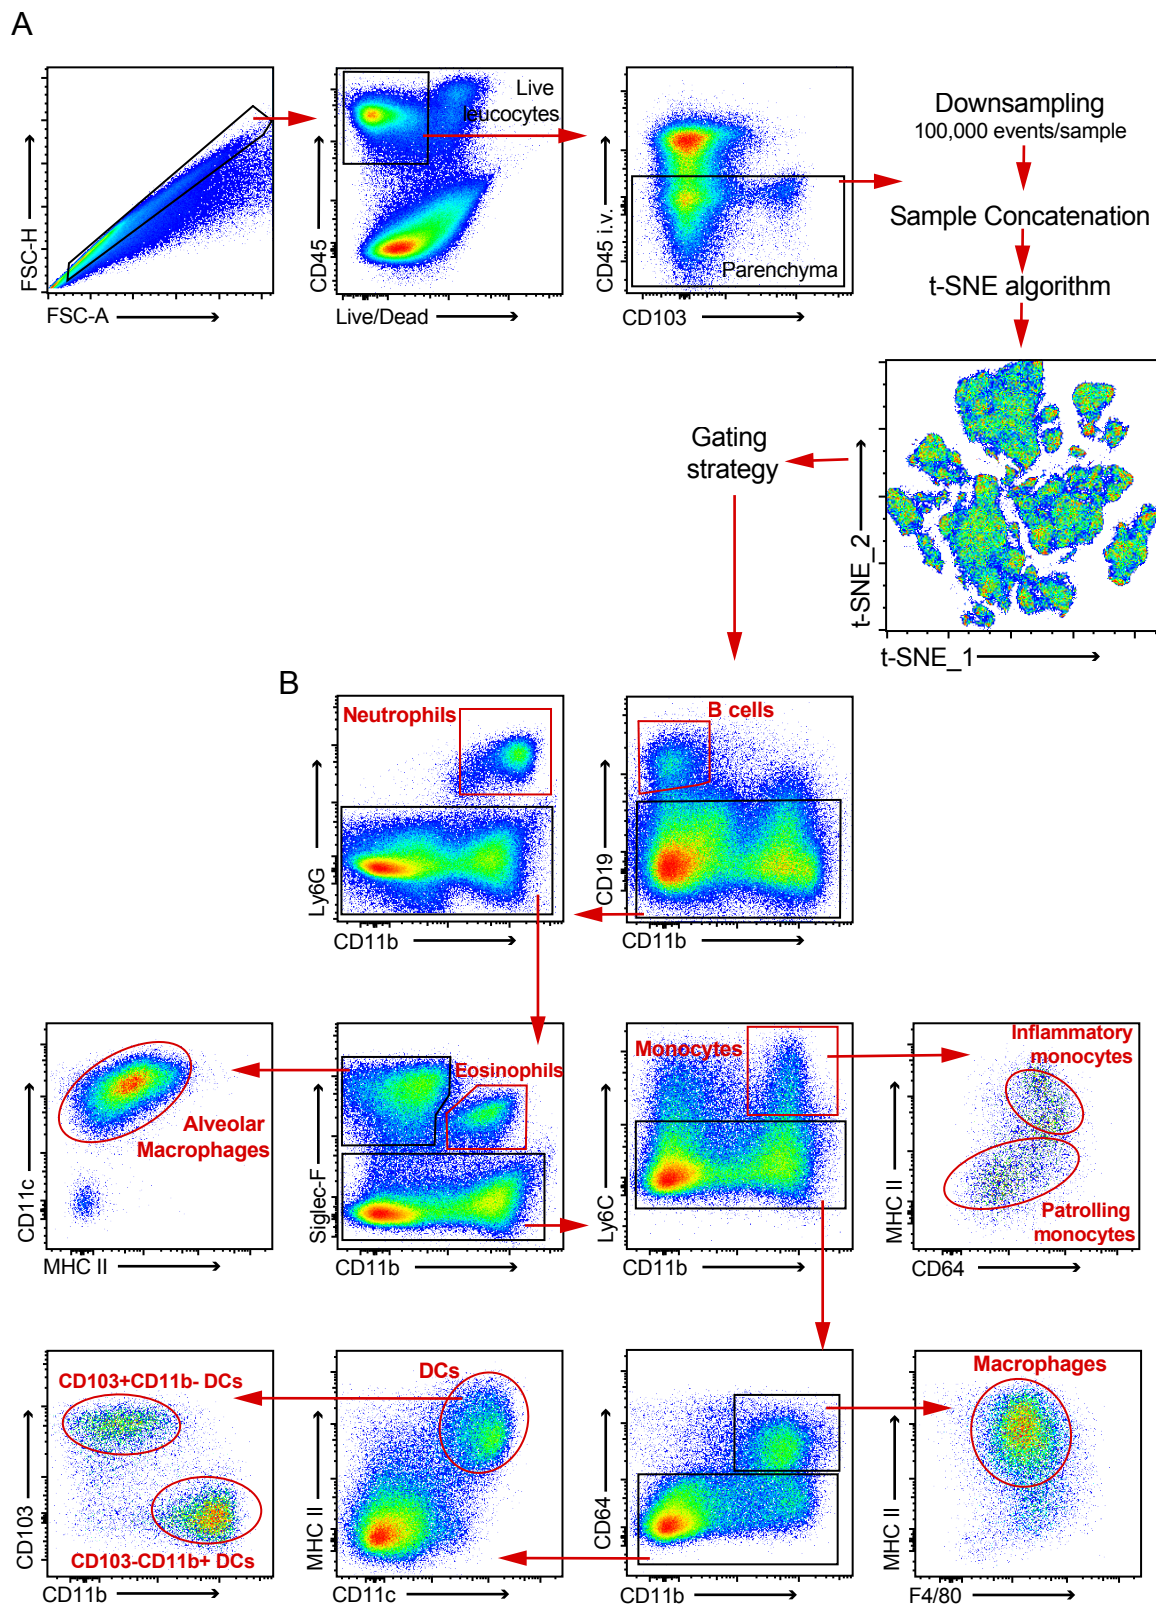

Supplement: s1 [file s1]
